# Supplementary material for: A series of coordination polymers based on reduced Schiff base multidentate anions and bis(imidazole) ligands: syntheses, structures and photoluminescence
Source: Royal Society of Chemistry journal article supplement (doi:10.1039/c1ce05019b), 2011-01-01
Supplement: c1ce05019b.pdf [file c1ce05019b.pdf]

## Electronic supplementary information

### A series of coordination polymers based on reduced Schiff base multidentate anions and bis(imidazole) ligands: syntheses, structures and photoluminescence

Ying-Ying Liu, Zhi-Hui Wang, Jin Yang\*, Bo Liu, Yun-Yu Liu and Jian-Fang Ma\*

*Key Lab for Polyoxometalate Science, Department of Chemistry, Northeast Normal  
University, Changchun 130024, People's Republic of China*

\* Correspondence authors

E-mail: yangjinnenu@yahoo.com.cn (J. Yang)

E-mail: jianfangma@yahoo.com.cn (J.-F. Ma)

Fax: +86-431-85098620 (J.-F. Ma)

**Table S1.** Selected bond distances (Å) and angles (°) for compounds **1-11**.

---

|                                |           |                                              |          |
|--------------------------------|-----------|----------------------------------------------|----------|
| <b>1</b>                       |           |                                              |          |
| Zn(1)-O(4) <sup>#1</sup>       | 1.961(4)  | Zn(1)-O(1)                                   | 1.988(4) |
| Zn(1)-N(4) <sup>#2</sup>       | 2.014(5)  | Zn(1)-N(1)                                   | 2.031(5) |
| O(4) <sup>#1</sup> -Zn(1)-O(1) | 93.61(17) | O(4) <sup>#1</sup> -Zn(1)-N(4) <sup>#2</sup> | 117.3(2) |
| O(1)-Zn(1)-N(4) <sup>#2</sup>  | 124.0(2)  | O(4) <sup>#1</sup> -Zn(1)-N(1)               | 114.5(2) |
| O(1)-Zn(1)-N(1)                | 102.1(2)  | N(4) <sup>#2</sup> -Zn(1)-N(1)               | 104.8(2) |
| <b>2</b>                       |           |                                              |          |
| Co(1)-O(3) <sup>#1</sup>       | 1.920(9)  | Co(1)-N(1)                                   | 2.035(3) |
| Co(1)-O(2)                     | 2.042(3)  | Co(1)-N(4) <sup>#2</sup>                     | 2.050(4) |
| Co(1)-O(1)                     | 2.163(8)  | Co(1)-O(3) <sup>#1</sup>                     | 2.186(7) |
| Co(1)-O(4) <sup>#1</sup>       | 2.316(8)  |                                              |          |

|                                               |            |                                               |            |
|-----------------------------------------------|------------|-----------------------------------------------|------------|
| O(3') <sup>#1</sup> -Co(1)-N(1)               | 126.2(4)   | O(3') <sup>#1</sup> -Co(1)-O(2)               | 86.0(3)    |
| N(1)-Co(1)-O(2)                               | 106.72(15) | O(3') <sup>#1</sup> -Co(1)-N(4) <sup>#2</sup> | 102.5(4)   |
| N(1)-Co(1)-N(4) <sup>#2</sup>                 | 103.90(13) | O(2)-Co(1)-N(4) <sup>#2</sup>                 | 134.03(18) |
| O(3') <sup>#1</sup> -Co(1)-O(1)               | 132.0(4)   | N(1)-Co(1)-O(1)                               | 95.8(2)    |
| O(2)-Co(1)-O(1)                               | 57.59(17)  | N(4) <sup>#2</sup> -Co(1)-O(1)                | 86.11(18)  |
| O(3') <sup>#1</sup> -Co(1)-O(3) <sup>#1</sup> | 21.9(3)    | N(1)-Co(1)-O(3) <sup>#1</sup>                 | 147.8(2)   |
| O(2)-Co(1)-O(3) <sup>#1</sup>                 | 82.71(17)  | N(4) <sup>#2</sup> -Co(1)-O(3) <sup>#1</sup>  | 89.2(2)    |
| O(1)-Co(1)-O(3) <sup>#1</sup>                 | 114.5(2)   | O(3') <sup>#1</sup> -Co(1)-O(4) <sup>#1</sup> | 42.2(4)    |
| N(1)-Co(1)-O(4) <sup>#1</sup>                 | 90.9(2)    | O(2)-Co(1)-O(4) <sup>#1</sup>                 | 120.6(3)   |
| N(4) <sup>#2</sup> -Co(1)-O(4) <sup>#1</sup>  | 91.9(2)    | O(1)-Co(1)-O(4) <sup>#1</sup>                 | 173.2(3)   |
| O(3) <sup>#1</sup> -Co(1)-O(4) <sup>#1</sup>  | 58.9(3)    |                                               |            |

### 3

|                                              |            |                                              |            |
|----------------------------------------------|------------|----------------------------------------------|------------|
| Cd(1)-N(4) <sup>#1</sup>                     | 2.213(4)   | Cd(1)-O(2)                                   | 2.244(3)   |
| Cd(1)-N(1)                                   | 2.252(4)   | Cd(1)-O(4) <sup>#2</sup>                     | 2.255(4)   |
| Cd(1)-O(1)                                   | 2.474(4)   | Cd(1)-O(3) <sup>#2</sup>                     | 2.648(3)   |
| N(4) <sup>#1</sup> -Cd(1)-O(2)               | 110.68(14) | N(4) <sup>#1</sup> -Cd(1)-N(1)               | 102.83(14) |
| O(2)-Cd(1)-N(1)                              | 134.69(13) | N(4) <sup>#1</sup> -Cd(1)-O(4) <sup>#2</sup> | 135.10(14) |
| O(2)-Cd(1)-O(4) <sup>#2</sup>                | 83.56(14)  | N(1)-Cd(1)-O(4) <sup>#2</sup>                | 93.81(16)  |
| N(4) <sup>#1</sup> -Cd(1)-O(1)               | 104.44(14) | O(2)-Cd(1)-O(1)                              | 53.98(14)  |
| N(1)-Cd(1)-O(1)                              | 89.15(14)  | O(4) <sup>#2</sup> -Cd(1)-O(1)               | 117.37(14) |
| N(4) <sup>#1</sup> -Cd(1)-O(3) <sup>#2</sup> | 85.58(13)  | O(2)-Cd(1)-O(3) <sup>#2</sup>                | 120.77(13) |
| N(1)-Cd(1)-O(3) <sup>#2</sup>                | 90.73(13)  | O(4) <sup>#2</sup> -Cd(1)-O(3) <sup>#2</sup> | 52.41(12)  |
| O(1)-Cd(1)-O(3) <sup>#2</sup>                | 169.74(13) |                                              |            |

### 4

|                                              |           |                               |           |
|----------------------------------------------|-----------|-------------------------------|-----------|
| N(1)-Zn(1)                                   | 2.007(2)  | N(4)-Zn(1) <sup>#1</sup>      | 2.029(2)  |
| O(1)-Zn(1)                                   | 1.938(2)  | O(3)-Zn(1) <sup>#2</sup>      | 1.987(2)  |
| O(1)-Zn(1)-O(3) <sup>#3</sup>                | 113.45(8) | O(1)-Zn(1)-N(1)               | 124.60(8) |
| O(3) <sup>#3</sup> -Zn(1)-N(1)               | 106.98(8) | O(1)-Zn(1)-N(4) <sup>#4</sup> | 104.27(9) |
| O(3) <sup>#3</sup> -Zn(1)-N(4) <sup>#4</sup> | 104.12(9) | N(1)-Zn(1)-N(4) <sup>#4</sup> | 100.67(9) |

### 5

|                                |            |                                              |            |
|--------------------------------|------------|----------------------------------------------|------------|
| Co(1)-O(4) <sup>#1</sup>       | 1.968(2)   | Co(1)-N(1)                                   | 2.018(3)   |
| Co(1)-O(1)                     | 2.021(2)   | Co(1)-N(4) <sup>#2</sup>                     | 2.046(3)   |
| O(4) <sup>#1</sup> -Co(1)-N(1) | 130.33(12) | O(4) <sup>#1</sup> -Co(1)-O(1)               | 111.75(11) |
| N(1)-Co(1)-O(1)                | 105.25(11) | O(4) <sup>#1</sup> -Co(1)-N(4) <sup>#2</sup> | 104.81(11) |
| N(1)-Co(1)-N(4) <sup>#2</sup>  | 99.18(12)  | O(1)-Co(1)-N(4) <sup>#2</sup>                | 101.05(12) |

## 6

|                                              |            |                                 |           |
|----------------------------------------------|------------|---------------------------------|-----------|
| Cd(1)-N(1)                                   | 2.208(2)   | Cd(1)-O(1)                      | 2.329(2)  |
| Cd(1)-O(3) <sup>#1</sup>                     | 2.3297(19) | Cd(1)-O(2)                      | 2.345(2)  |
| Cd(1)-O(3) <sup>#2</sup>                     | 2.3881(19) | Cd(1)-O(4) <sup>#1</sup>        | 2.441(2)  |
| Cd(1)-O(1W)                                  | 2.616(3)   |                                 |           |
| N(1)-Cd(1)-O(1)                              | 102.91(7)  | N(1)-Cd(1)-O(3) <sup>#1</sup>   | 103.70(7) |
| O(1)-Cd(1)-O(3) <sup>#1</sup>                | 152.85(7)  | N(1)-Cd(1)-O(2)                 | 154.72(8) |
| O(1)-Cd(1)-O(2)                              | 55.34(6)   | O(3) <sup>#1</sup> -Cd(1)-O(2)  | 97.53(7)  |
| N(1)-Cd(1)-O(3) <sup>#2</sup>                | 87.20(7)   | O(1)-Cd(1)-O(3) <sup>#2</sup>   | 99.45(8)  |
| O(3) <sup>#1</sup> -Cd(1)-O(3) <sup>#2</sup> | 76.59(7)   | O(2)-Cd(1)-O(3) <sup>#2</sup>   | 84.49(7)  |
| N(1)-Cd(1)-O(4) <sup>#1</sup>                | 113.88(8)  | O(1)-Cd(1)-O(4) <sup>#1</sup>   | 118.32(7) |
| O(3) <sup>#1</sup> -Cd(1)-O(4) <sup>#1</sup> | 53.80(6)   | O(2)-Cd(1)-O(4) <sup>#1</sup>   | 89.71(8)  |
| O(3) <sup>#2</sup> -Cd(1)-O(4) <sup>#1</sup> | 128.78(6)  | N(1)-Cd(1)-O(1W)                | 84.93(9)  |
| O(1)-Cd(1)-O(1W)                             | 75.44(10)  | O(3) <sup>#1</sup> -Cd(1)-O(1W) | 112.3(1)  |
| O(2)-Cd(1)-O(1W)                             | 99.69(9)   | O(3) <sup>#2</sup> -Cd(1)-O(1W) | 169.37(8) |
| O(4) <sup>#1</sup> -Cd(1)-O(1W)              | 61.34(9)   |                                 |           |

## 7

|                                              |            |                                              |            |
|----------------------------------------------|------------|----------------------------------------------|------------|
| Zn(1)-O(1)                                   | 2.009(4)   | Zn(1)-N(1)                                   | 2.046(5)   |
| Zn(1)-N(4) <sup>#1</sup>                     | 2.035(5)   | Zn(1)-O(4) <sup>#2</sup>                     | 2.113(5)   |
| Zn(1)-O(3) <sup>#2</sup>                     | 2.344(5)   |                                              |            |
| O(1)-Zn(1)-N(1)                              | 103.53(18) | O(1)-Zn(1)-N(4) <sup>#1</sup>                | 107.26(18) |
| N(1)-Zn(1)-N(4) <sup>#1</sup>                | 95.79(17)  | O(1)-Zn(1)-O(4) <sup>#2</sup>                | 129.89(18) |
| N(1)-Zn(1)-O(4) <sup>#2</sup>                | 103.70(18) | N(4) <sup>#1</sup> -Zn(1)-O(4) <sup>#2</sup> | 110.85(19) |
| O(1)-Zn(1)-O(3) <sup>#2</sup>                | 94.24(18)  | N(1)-Zn(1)-O(3) <sup>#2</sup>                | 160.51(17) |
| N(4) <sup>#1</sup> -Zn(1)-O(3) <sup>#2</sup> | 86.37(17)  | O(4) <sup>#2</sup> -Zn(1)-O(3) <sup>#2</sup> | 57.84(17)  |

## 8

|                                              |            |                                              |            |
|----------------------------------------------|------------|----------------------------------------------|------------|
| Co(1)-N(4) <sup>#1</sup>                     | 2.058(2)   | Co(1)-N(1)                                   | 2.059(2)   |
| Co(1)-O(3) <sup>#2</sup>                     | 2.0594(19) | Co(1)-O(1)                                   | 2.0993(19) |
| Co(1)-O(2)                                   | 2.2759(19) | Co(1)-O(4) <sup>#2</sup>                     | 2.399(2)   |
| N(4) <sup>#1</sup> -Co(1)-N(1)               | 93.63(8)   | N(4) <sup>#1</sup> -Co(1)-O(3) <sup>#2</sup> | 102.37(8)  |
| N(1)-Co(1)-O(3) <sup>#2</sup>                | 102.37(9)  | N(4) <sup>#1</sup> -Co(1)-O(1)               | 108.87(9)  |
| N(1)-Co(1)-O(1)                              | 104.90(8)  | O(3) <sup>#2</sup> -Co(1)-O(1)               | 136.58(8)  |
| N(4) <sup>#1</sup> -Co(1)-O(2)               | 87.23(8)   | N(1)-Co(1)-O(2)                              | 163.72(9)  |
| O(3) <sup>#2</sup> -Co(1)-O(2)               | 93.29(8)   | O(1)-Co(1)-O(2)                              | 59.71(7)   |
| N(4) <sup>#1</sup> -Co(1)-O(4) <sup>#2</sup> | 160.28(8)  | N(1)-Co(1)-O(4) <sup>#2</sup>                | 88.14(8)   |

|                                              |          |                               |          |
|----------------------------------------------|----------|-------------------------------|----------|
| O(3) <sup>#2</sup> -Co(1)-O(4) <sup>#2</sup> | 58.18(7) | O(1)-Co(1)-O(4) <sup>#2</sup> | 89.56(8) |
| O(2)-Co(1)-O(4) <sup>#2</sup>                | 96.52(7) |                               |          |

**9**

|                                              |            |                                              |            |
|----------------------------------------------|------------|----------------------------------------------|------------|
| Cd(1)-N(1)                                   | 2.239(2)   | Cd(1)-O(1)                                   | 2.2583(17) |
| Cd(1)-O(3) <sup>#1</sup>                     | 2.3197(17) | Cd(1)-O(2) <sup>#2</sup>                     | 2.3452(16) |
| Cd(1)-O(1W)                                  | 2.358(2)   | Cd(1)-O(4) <sup>#1</sup>                     | 2.4786(19) |
| N(1)-Cd(1)-O(1)                              | 107.93(7)  | N(1)-Cd(1)-O(3) <sup>#1</sup>                | 109.80(7)  |
| O(1)-Cd(1)-O(3) <sup>#1</sup>                | 95.00(7)   | N(1)-Cd(1)-O(2) <sup>#2</sup>                | 88.76(6)   |
| O(1)-Cd(1)-O(2) <sup>#2</sup>                | 155.13(6)  | O(3) <sup>#1</sup> -Cd(1)-O(2) <sup>#2</sup> | 96.47(6)   |
| N(1)-Cd(1)-O(1W)                             | 92.86(8)   | O(1)-Cd(1)-O(1W)                             | 81.25(7)   |
| O(3) <sup>#1</sup> -Cd(1)-O(1W)              | 156.99(7)  | O(2) <sup>#2</sup> -Cd(1)-O(1W)              | 79.57(7)   |
| N(1)-Cd(1)-O(4) <sup>#1</sup>                | 163.10(7)  | O(1)-Cd(1)-O(4) <sup>#1</sup>                | 81.57(7)   |
| O(3) <sup>#1</sup> -Cd(1)-O(4) <sup>#1</sup> | 54.47(6)   | O(2) <sup>#2</sup> -Cd(1)-O(4) <sup>#1</sup> | 87.28(6)   |
| O(1W)-Cd(1)-O(4) <sup>#1</sup>               | 102.56(7)  |                                              |            |

**10**

|                                              |            |                               |            |
|----------------------------------------------|------------|-------------------------------|------------|
| Zn(1)-O(1)                                   | 1.979(3)   | Zn(1)-O(4) <sup>#1</sup>      | 2.016(2)   |
| Zn(1)-N(1)                                   | 2.021(3)   | Zn(1)-N(4) <sup>#2</sup>      | 2.024(3)   |
| O(1)-Zn(1)-O(4) <sup>#1</sup>                | 106.62(11) | O(1)-Zn(1)-N(1)               | 113.24(14) |
| O(4) <sup>#1</sup> -Zn(1)-N(1)               | 122.13(11) | O(1)-Zn(1)-N(4) <sup>#2</sup> | 115.37(11) |
| O(4) <sup>#1</sup> -Zn(1)-N(4) <sup>#2</sup> | 95.76(13)  | N(1)-Zn(1)-N(4) <sup>#2</sup> | 102.75(15) |

**11**

|                                              |            |                                              |            |
|----------------------------------------------|------------|----------------------------------------------|------------|
| Cd(1)-N(1)                                   | 2.247(3)   | Cd(1)-O(2)                                   | 2.261(2)   |
| Cd(1)-O(1W)                                  | 2.314(3)   | Cd(1)-O(4) <sup>#1</sup>                     | 2.365(3)   |
| Cd(1)-O(3) <sup>#1</sup>                     | 2.488(3)   | Cd(1)-N(3) <sup>#2</sup>                     | 2.532(3)   |
| N(1)-Cd(1)-O(2)                              | 138.07(10) | N(1)-Cd(1)-O(1W)                             | 90.44(12)  |
| O(2)-Cd(1)-O(1W)                             | 89.52(11)  | N(1)-Cd(1)-O(4) <sup>#1</sup>                | 137.72(10) |
| O(2)-Cd(1)-O(4) <sup>#1</sup>                | 84.16(9)   | O(1W)-Cd(1)-O(4) <sup>#1</sup>               | 87.66(11)  |
| N(1)-Cd(1)-O(3) <sup>#1</sup>                | 85.30(10)  | O(2)-Cd(1)-O(3) <sup>#1</sup>                | 136.27(9)  |
| O(1W)-Cd(1)-O(3) <sup>#1</sup>               | 96.76(11)  | O(4) <sup>#1</sup> -Cd(1)-O(3) <sup>#1</sup> | 53.12(9)   |
| N(1)-Cd(1)-N(3) <sup>#2</sup>                | 88.99(11)  | O(2)-Cd(1)-N(3) <sup>#2</sup>                | 90.99(10)  |
| O(1W)-Cd(1)-N(3) <sup>#2</sup>               | 179.41(11) | O(4) <sup>#1</sup> -Cd(1)-N(3) <sup>#2</sup> | 92.68(10)  |
| O(3) <sup>#1</sup> -Cd(1)-N(3) <sup>#2</sup> | 83.06(10)  |                                              |            |

Symmetry codes for **1**: <sup>#1</sup> -x+1, y-1, -z+1/2; <sup>#2</sup> -x+3/2, -y+1/2, -z. For **2**: <sup>#1</sup> -x+1, y-1, -z+3/2; <sup>#2</sup> -x+1/2, -y+3/2, -z+2. For **3**: <sup>#1</sup> -x-1/2, -y-1/2, -z+2; <sup>#2</sup> -x, y+1, -z+3/2. For **4**: <sup>#1</sup> x+1/2, -y+1/2, z-1/2; <sup>#2</sup> x, y-1, z; <sup>#3</sup> x, y+1, z; <sup>#4</sup> x-1/2, -y+1/2, z+1/2. For **5**: <sup>#1</sup> x, y-1,

z; <sup>#2</sup> x-1/2, -y+1/2, z+1/2. For **6**: <sup>#1</sup> -x+1, -y+1, -z; <sup>#2</sup> x-1, y-1, z. For **7**: <sup>#1</sup> x+1/2, -y-1/2, z; <sup>#2</sup> x, y, z+1. For **8**: <sup>#1</sup> x-1/2, -y-1/2, z; <sup>#2</sup> x, y, z+1. For **9**: <sup>#1</sup> -x+1, -y+1, -z+1; <sup>#2</sup> -x+1/2, y-1/2, -z+3/2. For **10**: <sup>#1</sup> x-1/2, -y+1/2, z-1/2; <sup>#2</sup> -x+1/2, y-1/2, -z+1/2. For **11**: <sup>#1</sup> x+1/2, y+1/2, z; <sup>#2</sup> -x+1, -y, -z+1.

**Table S2.** Hydrogen-Bonding Parameters for **1-5** and **7-11** (in Å and deg)

|                                    | D-H...A   | d(D-H)    | d(D...A)  | ∠(D-H...A) |
|------------------------------------|-----------|-----------|-----------|------------|
| <b>1</b>                           |           |           |           |            |
| O(1W)-H(1WA)...O(1) <sup>#3</sup>  | 0.90(2)   | 2.49(16)  | 2.978(6)  | 115(13)    |
| O(1W)-H(1WB)...O(1) <sup>#4</sup>  | 0.89(2)   | 2.10(5)   | 2.978(6)  | 166(16)    |
| N(5)-H(5N)...O(4)                  | 0.87(2)   | 2.05(5)   | 2.715(6)  | 132(6)     |
| <b>2</b>                           |           |           |           |            |
| N(5)-H(1N)...O(2)                  | 0.78(5)   | 2.07(5)   | 2.660(5)  | 133(5)     |
| O(1W)-H(1WB)...O(3') <sup>#4</sup> | 1.08(16)  | 1.90(15)  | 2.919(10) | 156(15)    |
| <b>3</b>                           |           |           |           |            |
| O(1W)-H(1WA)...O(4) <sup>#4</sup>  | 0.86(2)   | 2.27(10)  | 3.048(5)  | 152(18)    |
| O(1W)-H(1WB)...O(4)                | 0.86(2)   | 2.25(9)   | 3.048(5)  | 154(17)    |
| N(5)-H(5N)...O(2)                  | 0.80(5)   | 2.01(5)   | 2.645(5)  | 137(5)     |
| <b>4</b>                           |           |           |           |            |
| N(5)-H(5N)...O(4) <sup>#5</sup>    | 0.815(16) | 2.224(17) | 3.034(4)  | 173(3)     |
| O(1W)-H(1WA)...O(3) <sup>#6</sup>  | 0.894(18) | 2.23(3)   | 3.047(3)  | 151(4)     |
| O(1W)-H(1WB)...O(2) <sup>#7</sup>  | 0.891(18) | 1.98(2)   | 2.872(4)  | 174(4)     |
| <b>5</b>                           |           |           |           |            |
| O(1W)-H(1B)...O(3)                 | 0.92      | 2.06      | 2.922(5)  | 155.7      |
| O(2W)-H(2B)...O(1W)                | 0.96      | 2.03      | 2.895(13) | 148.9      |
| N(5)-H(5N)...O(2) <sup>#5</sup>    | 0.76(4)   | 2.26(4)   | 3.014(4)  | 173(5)     |
| <b>7</b>                           |           |           |           |            |
| O(1W)-H(1WB)...O(4) <sup>#5</sup>  | 0.91(2)   | 2.15(4)   | 2.987(8)  | 153(8)     |
| N(5)-H(5N)...O(2) <sup>#6</sup>    | 0.853(18) | 2.27(3)   | 3.010(7)  | 146(3)     |
| O(1W)-H(1WA)...O(1)                | 0.89(2)   | 2.07(3)   | 2.935(7)  | 163(8)     |
| <b>8</b>                           |           |           |           |            |
| N(5)-H(5N)...O(4) <sup>#5</sup>    | 0.78(3)   | 2.35(3)   | 3.099(3)  | 160(3)     |
| O(1W)-H(1WB)...O(3) <sup>#6</sup>  | 0.851(18) | 2.15(3)   | 2.886(3)  | 144(4)     |
| O(1W)-H(1WA)...O(1)                | 0.861(18) | 2.17(2)   | 2.984(3)  | 158(4)     |

|                                   |           |           |          |        |
|-----------------------------------|-----------|-----------|----------|--------|
| <b>9</b>                          |           |           |          |        |
| O(1W)-H(1WA)...O(3) <sup>#5</sup> | 0.827(18) | 1.884(19) | 2.711(2) | 177(4) |
| O(3W)-H(3WA)...O(4) <sup>#1</sup> | 0.85(2)   | 2.03(3)   | 2.867(4) | 165(6) |
| O(1W)-H(1WB)...O(2W)              | 0.796(18) | 2.28(3)   | 2.984(5) | 148(4) |
| O(2W)-H(2WB)...O(1)               | 0.85(6)   | 2.05(3)   | 2.856(4) | 159(7) |
| <b>10</b>                         |           |           |          |        |
| O(6)-H(6)...O(3) <sup>#5</sup>    | 0.82      | 1.77      | 2.573(4) | 165.8  |
| N(5)-H(5N)...O(2) <sup>#6</sup>   | 0.84(3)   | 2.21(3)   | 3.046(4) | 174(4) |
| <b>11</b>                         |           |           |          |        |
| O(1W)-H(1WA)...O(5) <sup>#5</sup> | 0.84(4)   | 2.30(3)   | 3.037(5) | 145(4) |
| O(1W)-H(1WB)...O(1) <sup>#6</sup> | 0.842(19) | 1.93(2)   | 2.765(4) | 173(5) |

Symmetry code for **1**: <sup>#3</sup> -x+1, y+1, -z+1/2; <sup>#4</sup> x, y+1, z. For **2**: <sup>#4</sup> x, y-1, z. For **3**: <sup>#4</sup> -x, y, -z+3/2. For **4**: <sup>#5</sup> -x, -y-1, -z; <sup>#6</sup> x+1/2, -y-1/2, z-1/2; <sup>#7</sup> -x+1, -y, -z. For **5**: <sup>#5</sup> -x+1, -y+1, -z+1. For **7**: <sup>#5</sup> -x+1, -y, z+1/2; <sup>#6</sup> -x+1/2, y+1/2, z-1/2. For **8**: <sup>#5</sup> -x+1/2, y+1/2, z+1/2; <sup>#6</sup> -x, -y, z+1/2. For **9**: <sup>#1</sup> -x+1, -y+1, -z+1; <sup>#5</sup> x-1/2, -y+1/2, z+1/2. For **10**: <sup>#5</sup> x+1/2, -y+1/2, z-1/2; <sup>#6</sup> -x+3/2, y+1/2, -z+1/2. For **11**: <sup>#5</sup> -x+1/2, y+1/2, -z+1/2; <sup>#6</sup> -x+1/2, -y+1/2, -z+1.

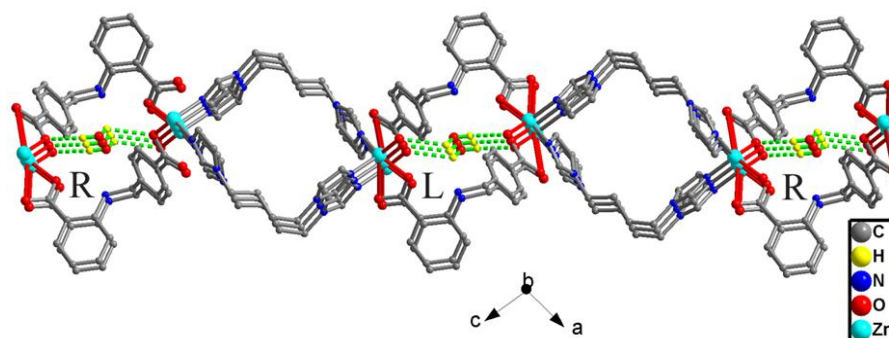

**Fig. S1** The helical channels and the hydrogen bonds in the layer of **1**.

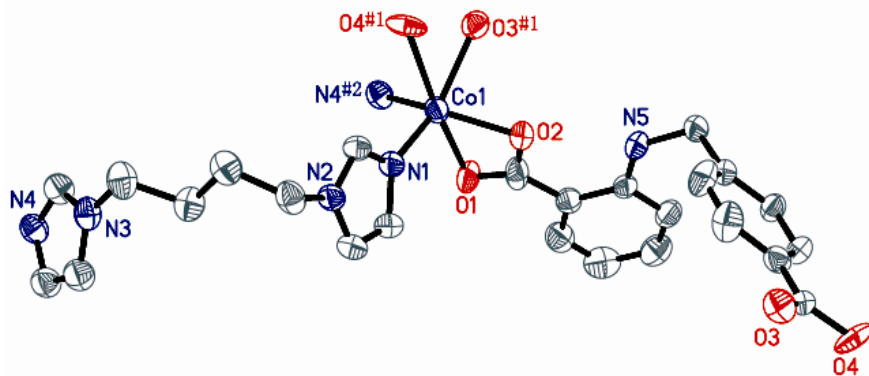

**Fig. S2** ORTEP diagram showing the coordination environment for Co(II) atom in **2**.

Symmetry codes: #1  $-x+1, y-1, -z+3/2$ ; #2  $-x+1/2, -y+3/2, -z+2$ .

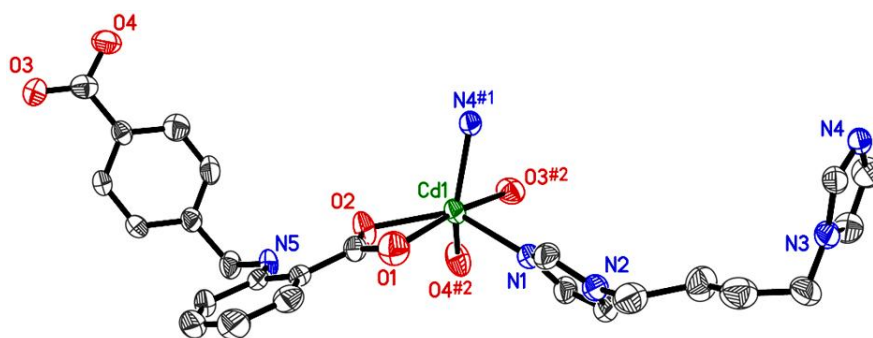

(a)

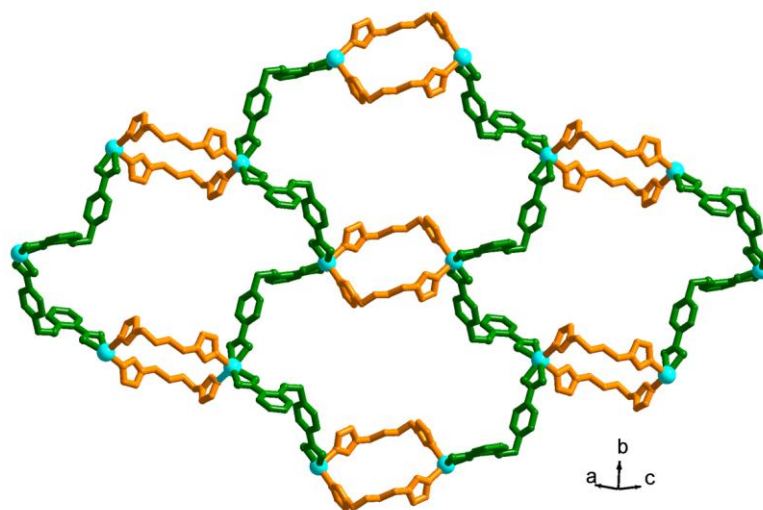

(b)

a  
b  
c

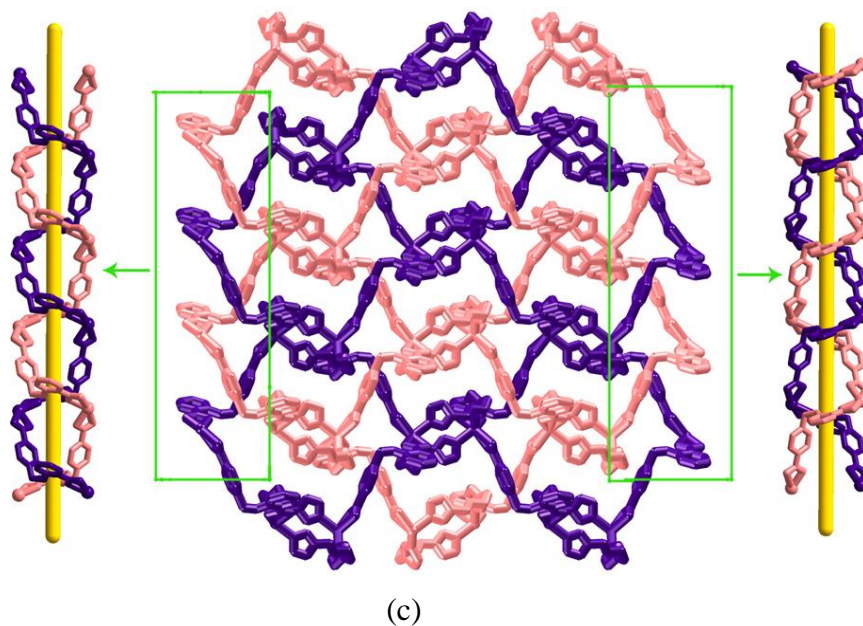

**Fig. S3** (a) ORTEP diagram showing the coordination environment for Cd atom in **3**. Symmetry codes: <sup>#1</sup>  $-x-1/2, -y-1/2, -z+2$ ; <sup>#2</sup>  $-x, y+1, -z+3/2$ . (b) View of the layer connected by  $[\text{Co}(\text{bbi})_2\text{Co}]$  or  $[\text{Cd}(\text{bbi})_2\text{Cd}]$  dimers and  $\text{L}^1$  anions of **2** and **3**. (c) Two-fold interpenetrating layer and the double-stranded helix of **2** and **3** along the  $b$ -axis.

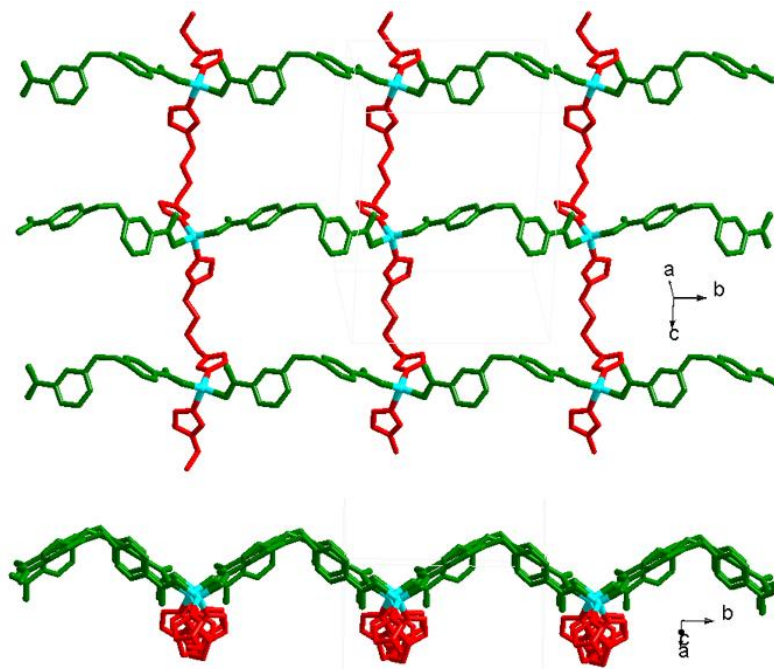

**Fig. S4** View of the 2D undulated layer from different directions in **4** ( $\text{L}^2$  and bbi ligands were shown in distinct color).



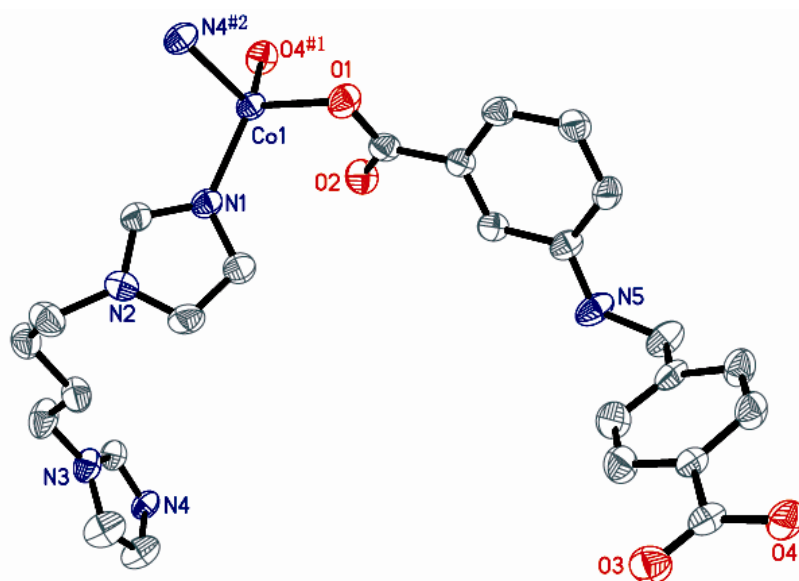

**Fig. S5** (a) ORTEP diagram showing the coordination environment for Co atom in **5**.  
Symmetry codes: <sup>#1</sup>  $x, y-1, z$ ; <sup>#2</sup>  $x-1/2, -y+1/2, z+1/2$ .

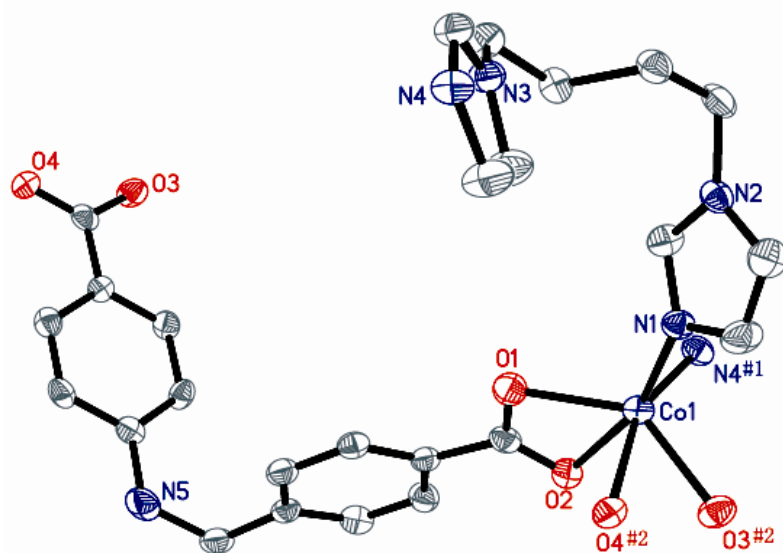

**Fig. S6** (a) ORTEP diagram showing the coordination environment for Co atom in **8**.  
Symmetry codes: <sup>#1</sup>  $x-1/2, -y-1/2, z$ ; <sup>#2</sup>  $x, y, z+1$ .

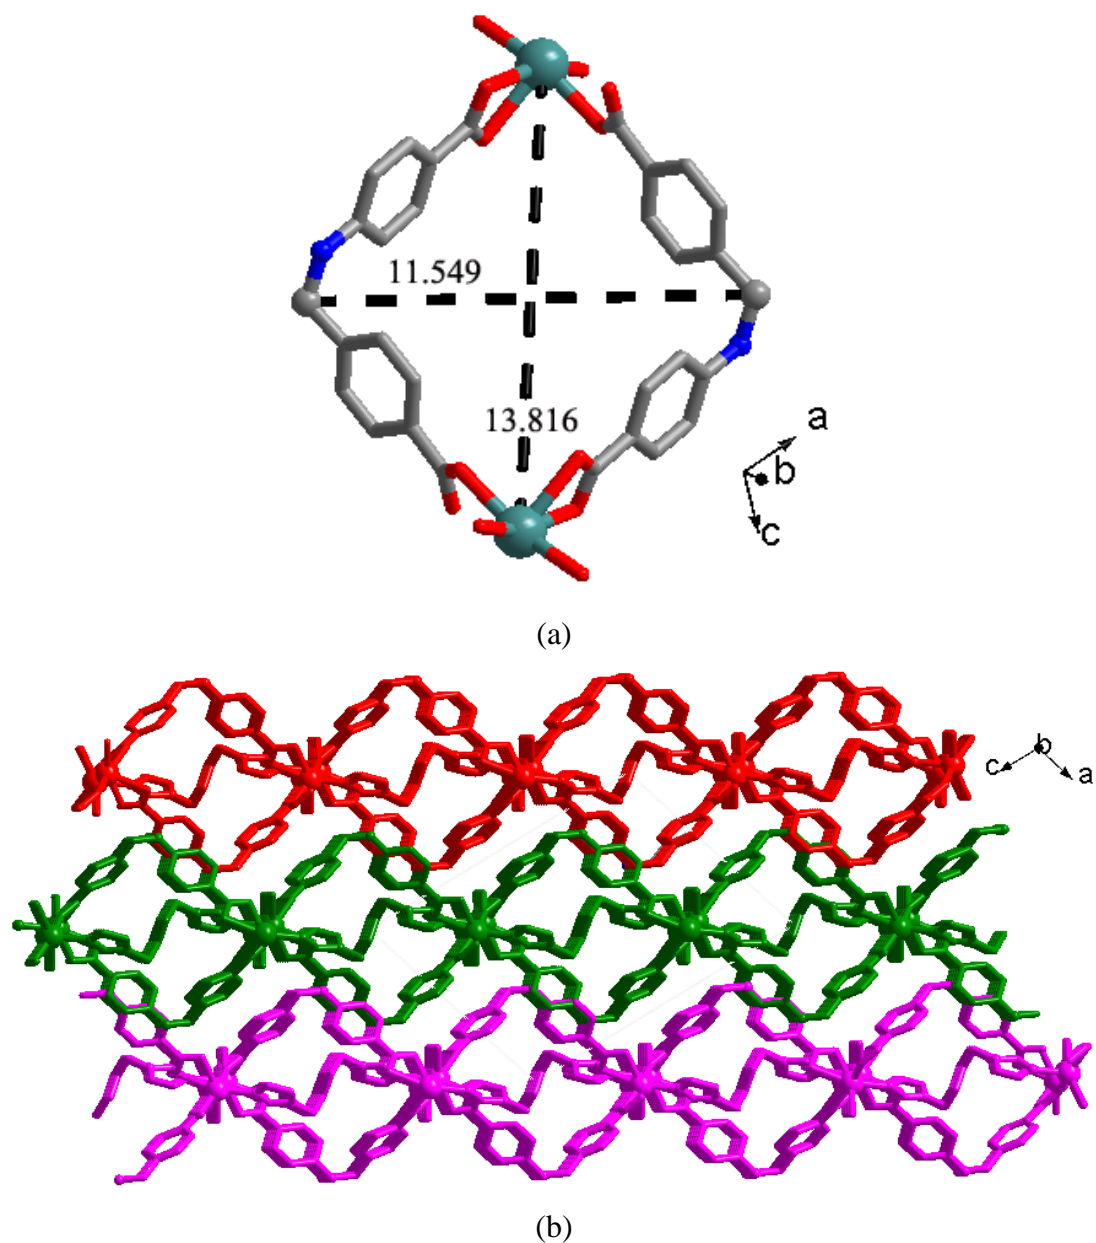

**Fig. S7.** (a) View of the  $[\text{Cd}_2(\text{L}^3)_2]$  ring in **9**. (b) The 3D supramolecular structure of **9**.

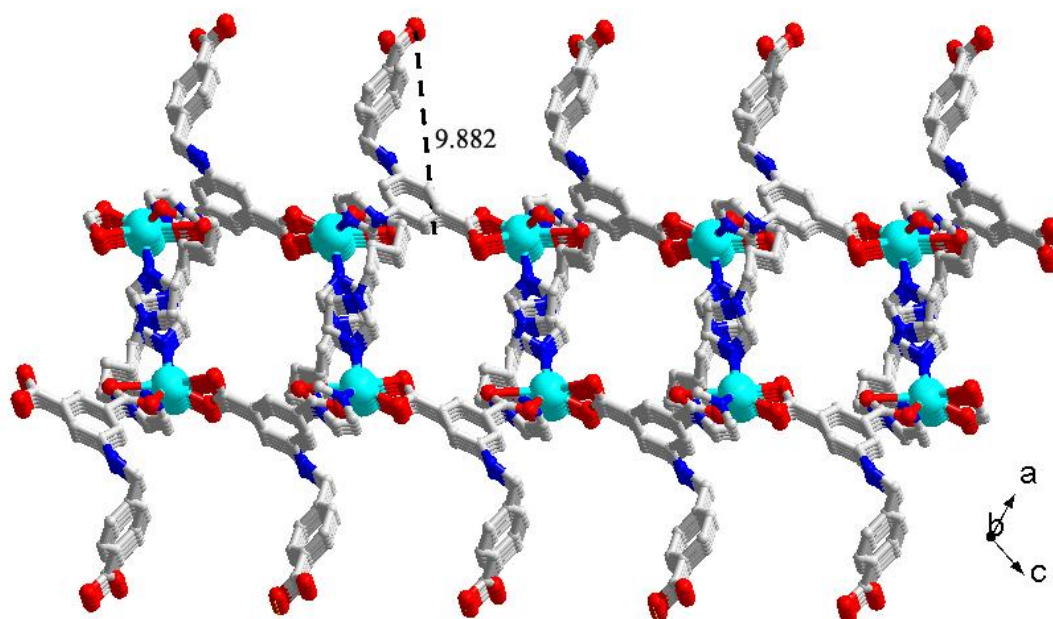

**Fig. S8.** View of the undulated layer of **10** with dangling arms.

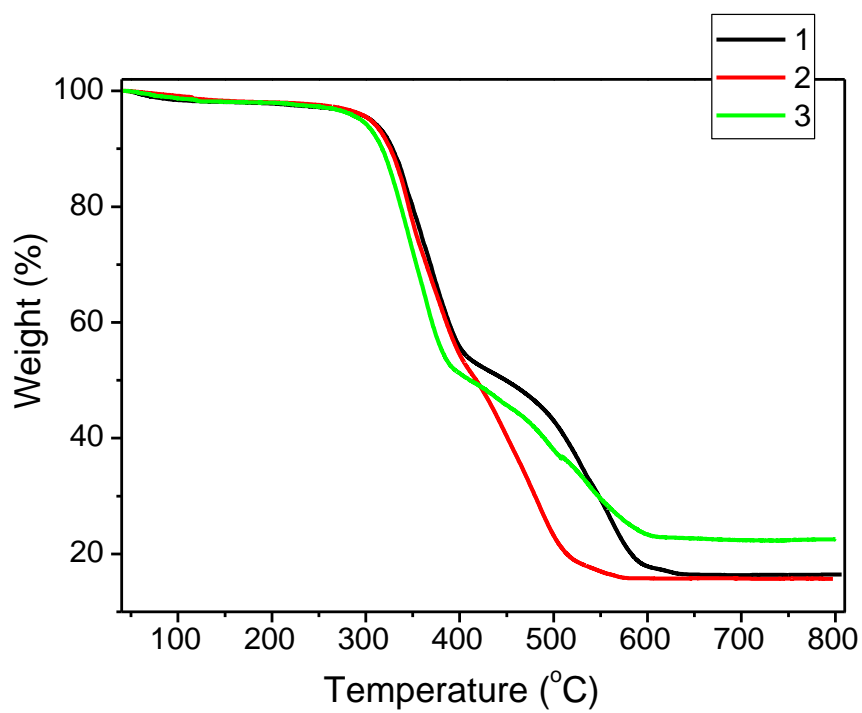

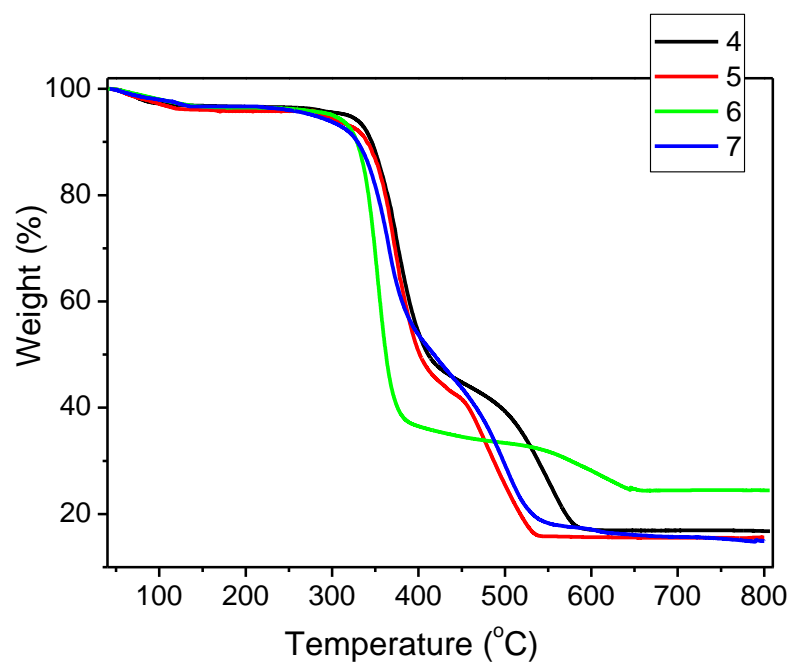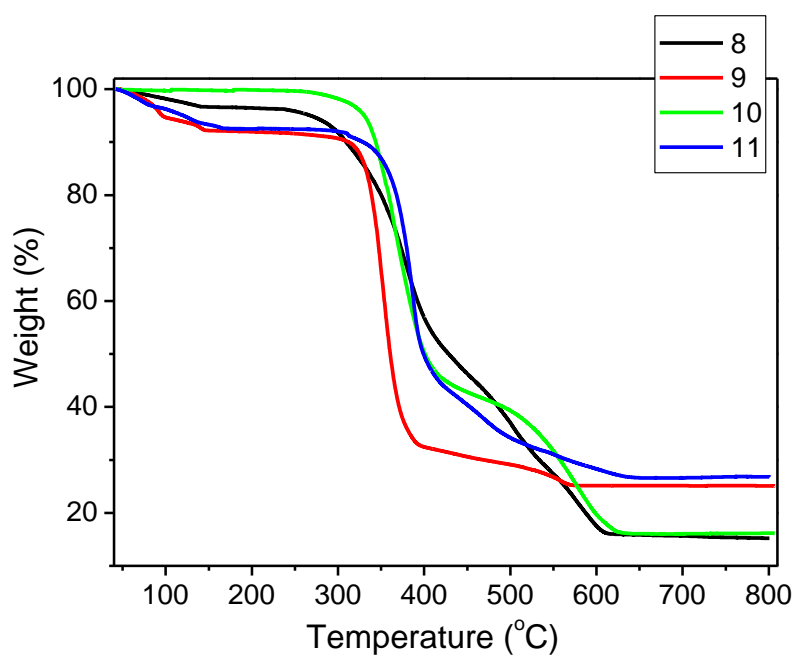

**Fig. S9.** TGA curves of compounds **1-11**.

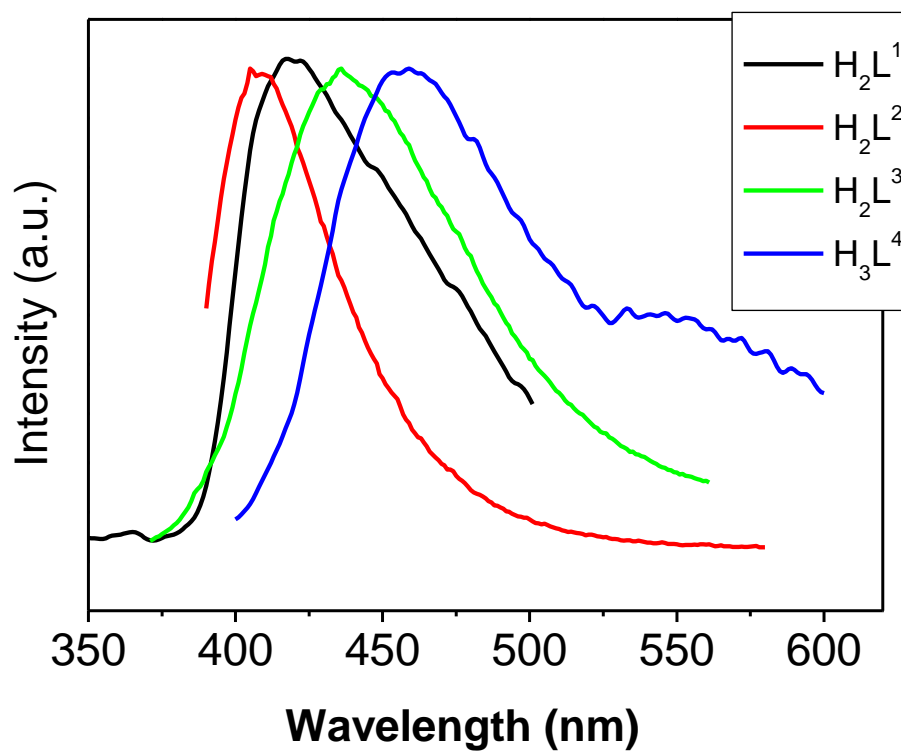

**Fig. S10.** Solid-state emission spectra of H<sub>2</sub>L<sup>1</sup>, H<sub>2</sub>L<sup>2</sup>, H<sub>2</sub>L<sup>3</sup> and H<sub>3</sub>L<sup>4</sup> at room temperature.

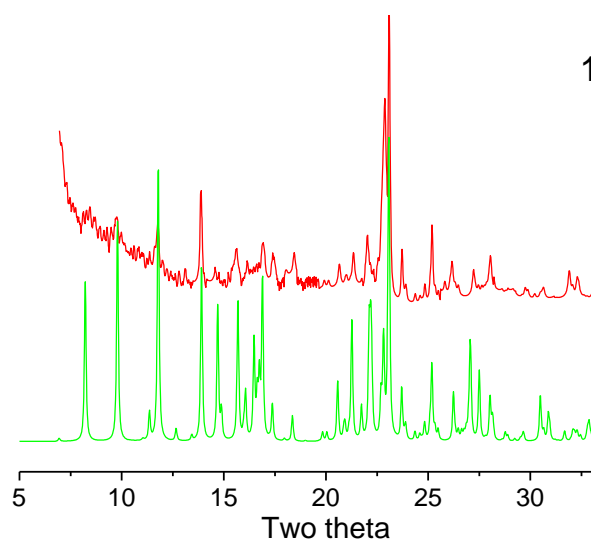

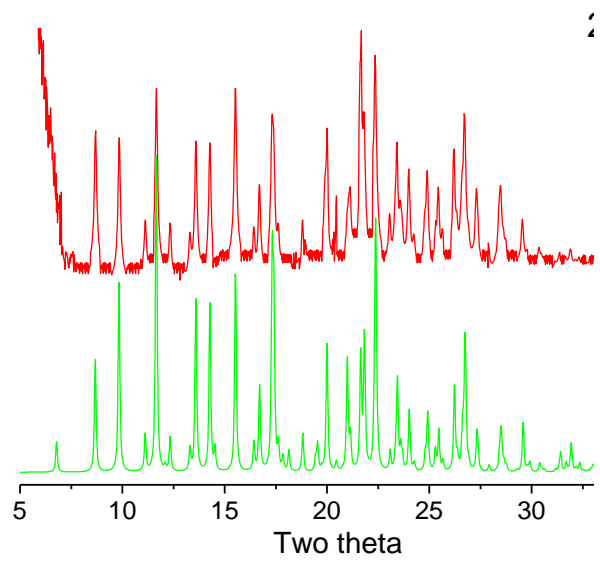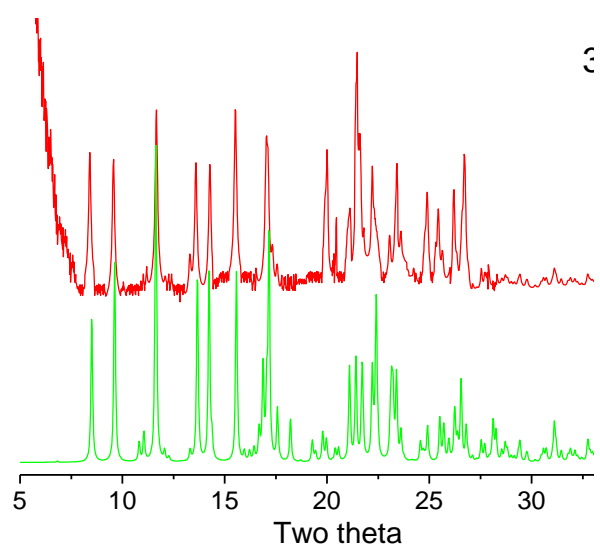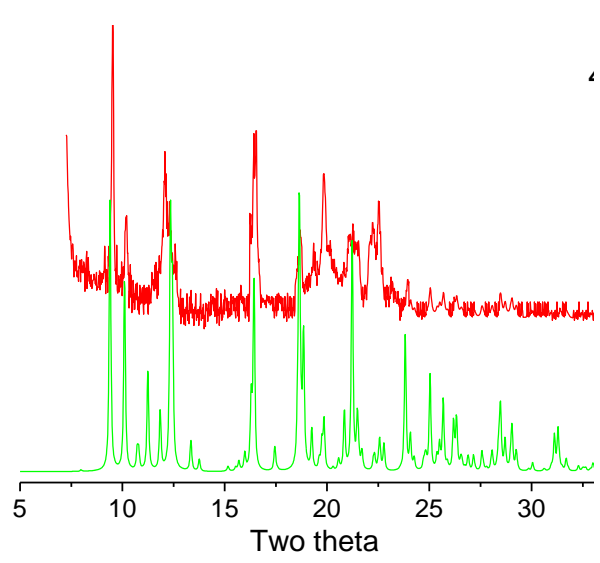

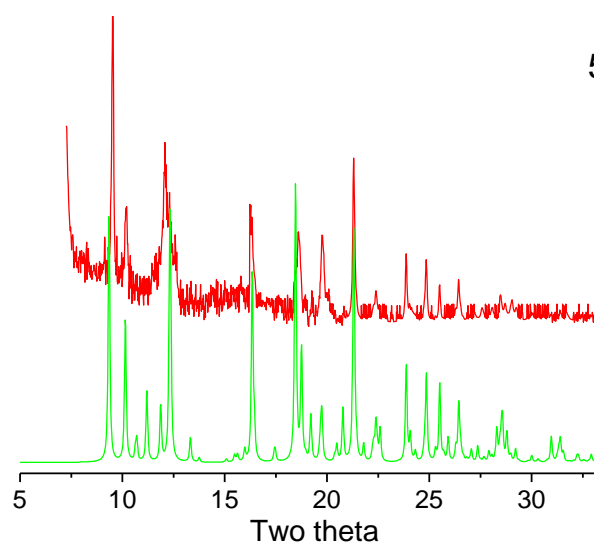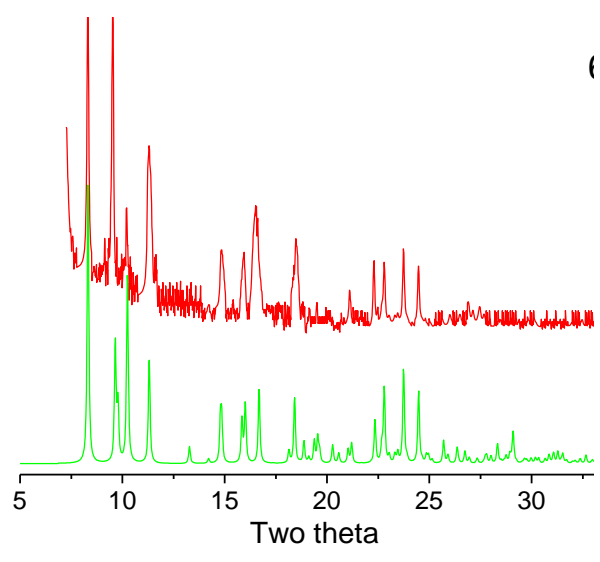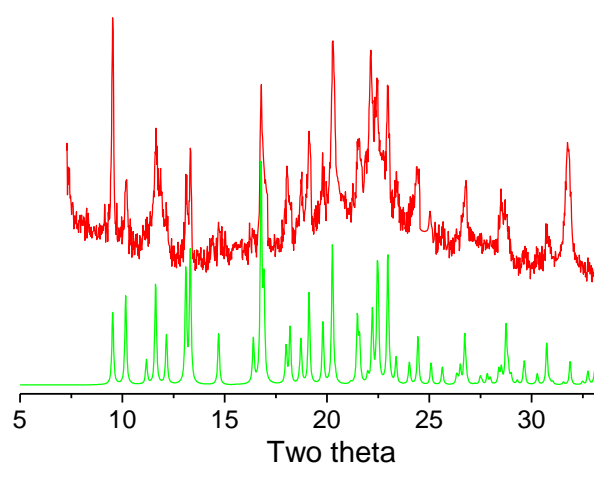

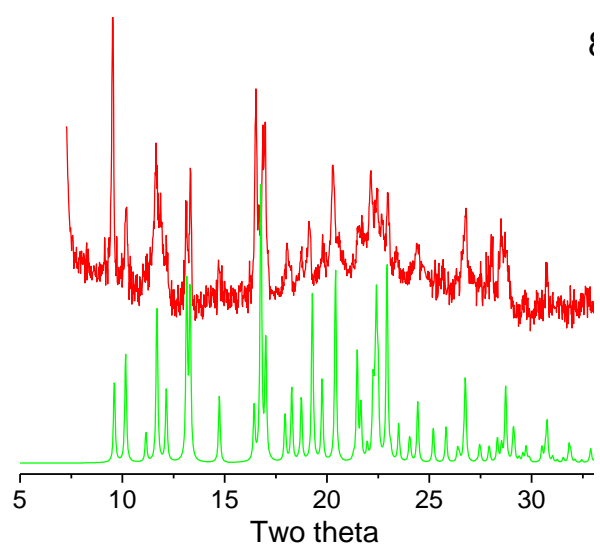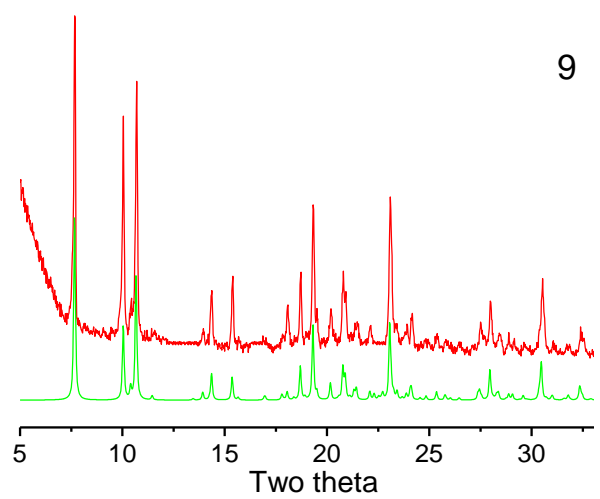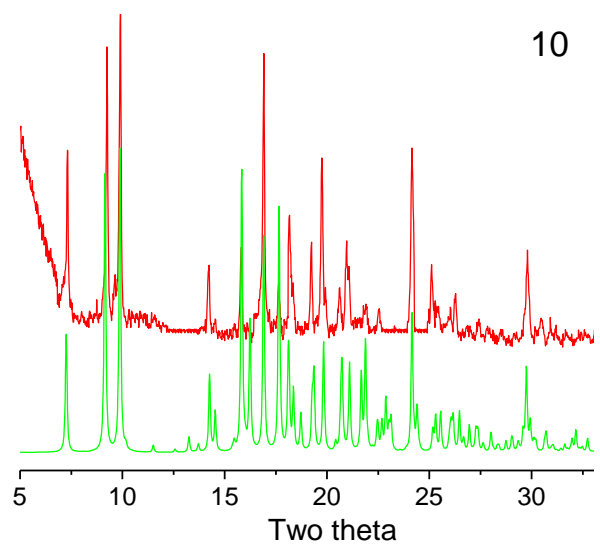



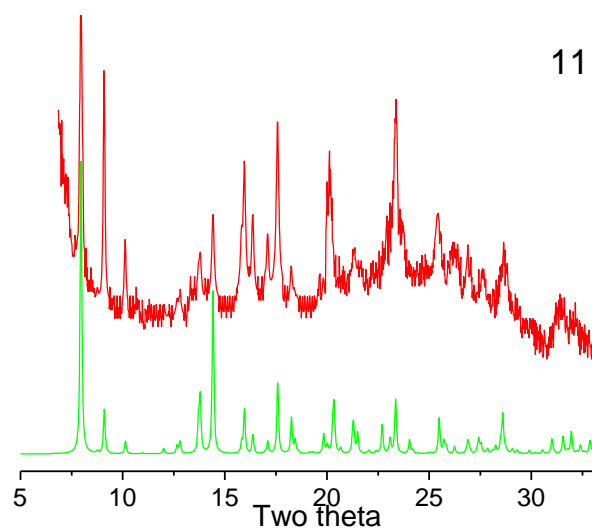

**Fig. S11.** The simulated (green) and experimental (red) XRPD patterns for the compounds **1-11** (the diffraction peaks of both simulated and experimental patterns match well in relevant positions, indicating that the phase purities of compounds **1-11** are good).
